# Supplementary material for: A Machine Learning Model to Predict Knee Osteoarthritis Cartilage Volume Changes over Time Using Baseline Bone Curvature
Source: MDPI journal article supplement (doi:10.3390/biomedicines10061247), 2022-05-26
Supplement: s1 [file s1]

---

**SUPPLEMENTARY MATERIALS**
**Table S1. The optimal values of the user-defined parameters of the machine learning methods**

| Method  | Parameter                                                                       | Setting  |
|---------|---------------------------------------------------------------------------------|----------|
| M5P     | The minimum allowable number of instances at a leaf node                        | 21       |
|         | The number of decimal places to be used for the output of numbers in the models | 24       |
| RF      | The number of randomly chosen attributes                                        | 10       |
|         | Seed                                                                            | 20       |
|         | The maximum depth of the tree                                                   | 5        |
|         | The number of decimal places to be used for the output of numbers in the models | 4        |
| M5Rules | The minimum number of instances to allow at a leaf node                         | 18       |
|         | The number of decimal places to be used for the output of numbers in the models | 4        |
| MLP     | The learning rates for weight updates                                           | 0.3      |
|         | Momentum applied to the weight updates                                          | 0.2      |
|         | Iteration number                                                                | 10000    |
|         | Seed used to initialize the random number generator                             | 100      |
|         | The number of decimal places to be used for the output of numbers in the models | 4        |
| ANFIS   | Iteration number                                                                | 10000    |
|         | Optimal values of initial-increase                                              | 1.1      |
|         | Step-size-decrease                                                              | 0.9      |
|         | Initial step-size                                                               | 0.01     |
|         | Membership function                                                             | Gaussian |

M5P, M5 prime; RF, random forest; MLP, multilayer perceptron; ANFIS, adaptive neuro-fuzzy inference system

**Table S2. Performance of five machine learning algorithms in predicting cartilage volume loss at one year in 12 regions**

|           | ANFIS |       |       | RF   |       |       | MLP  |       |       | M5Rules |       |       | M5P  |       |       |
|-----------|-------|-------|-------|------|-------|-------|------|-------|-------|---------|-------|-------|------|-------|-------|
| Outcome   | R     | RMSE  | MAE   | R    | RMSE  | MAE   | R    | RMSE  | MAE   | R       | RMSE  | MAE   | R    | RMSE  | MAE   |
| <b>1</b>  | 0.78  | 0.020 | 0.015 | 0.72 | 0.025 | 0.020 | 0.65 | 0.027 | 0.021 | 0.70    | 0.023 | 0.017 | 0.64 | 0.024 | 0.019 |
| <b>2</b>  | 0.74  | 0.022 | 0.015 | 0.70 | 0.026 | 0.020 | 0.63 | 0.026 | 0.019 | 0.67    | 0.025 | 0.018 | 0.64 | 0.025 | 0.019 |
| <b>3</b>  | 0.81  | 0.021 | 0.016 | 0.71 | 0.028 | 0.022 | 0.65 | 0.028 | 0.022 | 0.76    | 0.025 | 0.019 | 0.63 | 0.028 | 0.021 |
| <b>4</b>  | 0.86  | 0.027 | 0.020 | 0.74 | 0.028 | 0.022 | 0.59 | 0.033 | 0.026 | 0.67    | 0.027 | 0.020 | 0.61 | 0.028 | 0.021 |
| <b>5</b>  | 0.78  | 0.021 | 0.015 | 0.72 | 0.028 | 0.022 | 0.60 | 0.030 | 0.024 | 0.72    | 0.024 | 0.019 | 0.58 | 0.028 | 0.021 |
| <b>6</b>  | 0.77  | 0.023 | 0.016 | 0.71 | 0.029 | 0.023 | 0.67 | 0.028 | 0.021 | 0.69    | 0.027 | 0.020 | 0.49 | 0.031 | 0.023 |
| <b>7</b>  | 0.78  | 0.025 | 0.017 | 0.67 | 0.033 | 0.026 | 0.68 | 0.032 | 0.025 | 0.72    | 0.029 | 0.022 | 0.56 | 0.033 | 0.024 |
| <b>8</b>  | 0.74  | 0.036 | 0.026 | 0.72 | 0.031 | 0.024 | 0.77 | 0.025 | 0.019 | 0.74    | 0.027 | 0.020 | 0.56 | 0.031 | 0.024 |
| <b>9</b>  | 0.77  | 0.027 | 0.020 | 0.72 | 0.034 | 0.027 | 0.68 | 0.035 | 0.027 | 0.70    | 0.031 | 0.024 | 0.64 | 0.032 | 0.025 |
| <b>10</b> | 0.78  | 0.026 | 0.018 | 0.70 | 0.033 | 0.026 | 0.68 | 0.032 | 0.024 | 0.71    | 0.030 | 0.023 | 0.64 | 0.032 | 0.024 |
| <b>11</b> | 0.86  | 0.026 | 0.018 | 0.76 | 0.040 | 0.030 | 0.63 | 0.042 | 0.032 | 0.68    | 0.040 | 0.029 | 0.64 | 0.039 | 0.029 |
| <b>12</b> | 0.76  | 0.057 | 0.040 | 0.75 | 0.038 | 0.030 | 0.56 | 0.051 | 0.042 | 0.72    | 0.036 | 0.027 | 0.63 | 0.038 | 0.028 |

Outcome 1, Global knee; 2, Global femur; 3, Global condyles; 4, Global tibial plateau; 5, Lateral compartment; 6, Lateral femur; 7, Lateral condyle; 8, Lateral tibial plateau; 9, Medial compartment; 10, Medial femur; 11, Medial condyle; 12, Medial tibial plateau. ANFIS, adaptive neuro-fuzzy inference system; RF, random forest; MLP, multilayer perceptron; M5P, M5 prime; R, correlation coefficient; RMSE, root mean square error; MAE, mean absolute error.
